# Supplementary material for: Proteins in Tumor-Derived Plasma Extracellular Vesicles Indicate Tumor Origin
Source: PubMed Central journal article supplement (PMC9801135; doi:10.1016/j.mcpro.2022.100476), 2022-12-05

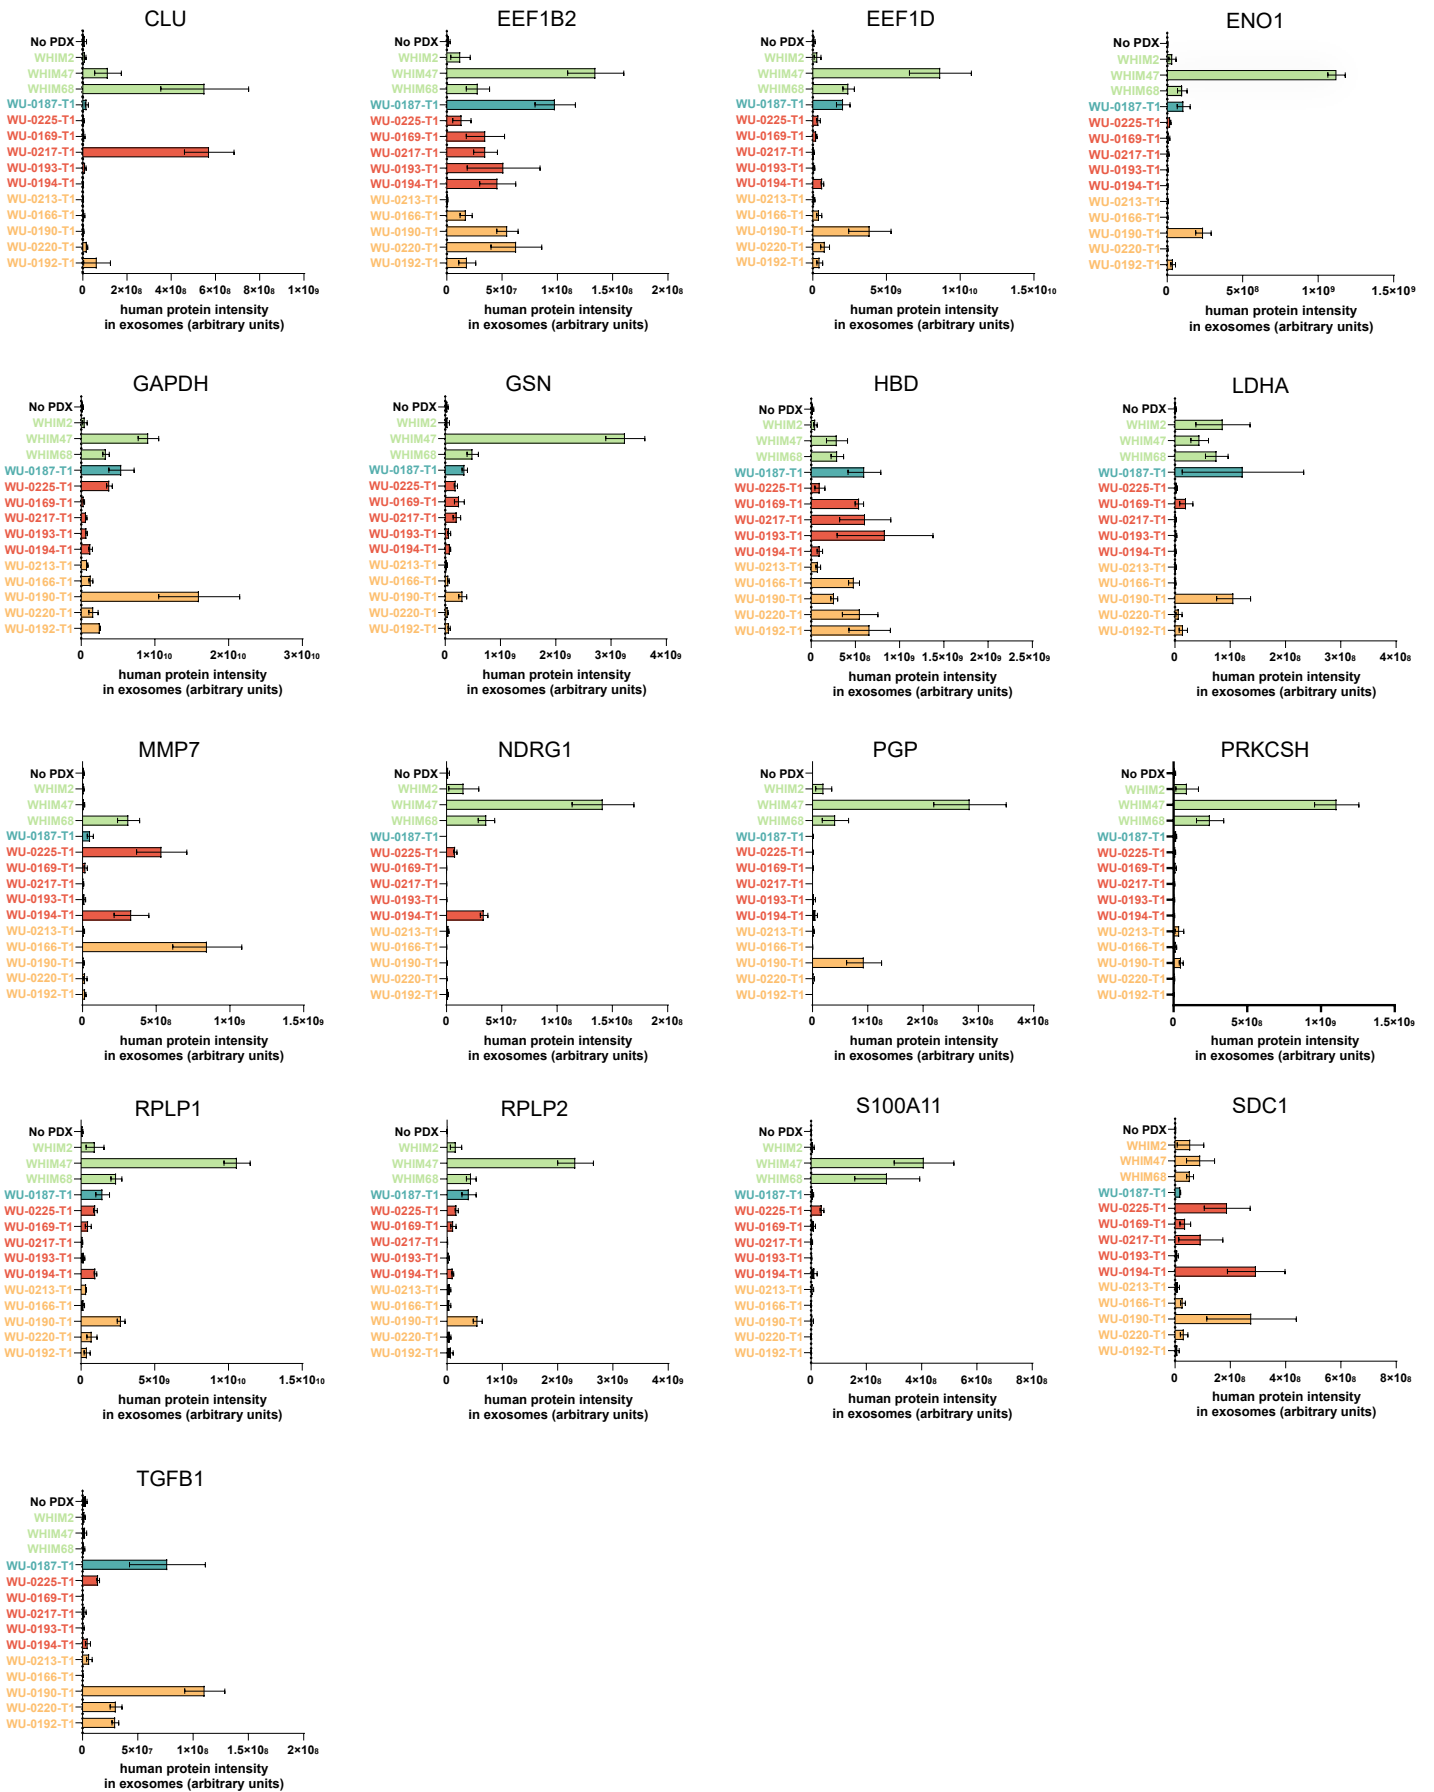

Supplement: mmc3.pdf [file mmc3.pdf]
